# Supplementary material
Source: HighWire-hosted journal article supplement (https://www.cmajopen.ca/highwire/filestream/81101/field_highwire_adjunct_files/0/2016-0136-1-at.pdf)
Supplement: 2016-0136-1-at.pdf [file 2016-0136-1-at.pdf]

## Appendix 1 (as supplied by the authors): CASE REPORT FORM

Patient initials \_\_\_\_\_

Date of birth \_\_\_\_/\_\_\_\_/\_\_\_\_

Date of surgery \_\_\_\_/\_\_\_\_/\_\_\_\_

Procedure  CABG  
 Valve  
 CABG+valve  
 Other

Sex  Male  Female

Hypertension  Yes  No

Dyslipidemia  Yes  No

Diabetes  Yes  No

Smoking History  Yes  No

COPD  Yes  No

Renal insufficiency  Yes  No

PVD  Yes  No

CVD  Yes  No
